# Supplementary material for: Protein dynamics of human serum albumin at hypothermic temperatures investigated by temperature jump
Source: Royal Society of Chemistry journal article supplement (doi:10.1039/d2cp00220e), 2022-01-01
Supplement: d2cp00220e1.pdf [file d2cp00220e1.pdf]

## Supporting Information

# Protein Dynamics of Human Serum Albumin at Hypothermic Temperatures Investigated by Temperature Jump

*Chih-Tsun Yang and Li-Kang Chu\**

Department of Chemistry, National Tsing Hua University, 101, Sec. 2, Kuang-Fu Rd., Hsinchu  
300044, Taiwan.

## ***Table of contents***

### **1. Deriving the evolutions of the relative fluorescence intensity change**

### **2. Supplementary figures**

**Fig. S1.** Normalized fluorescence spectra of dissolved tryptophan and HSA at 25 – 50 °C upon 300 nm excitation.

**Fig. S2.** Schematic procedure to generate the relative fluorescence intensity change evolution for tryptophan upon T-jump by eliminating photobleaching.

**Fig. S3.** Raw data of the evolutions of the fluorescence change of dissolved tryptophan and HSA without and with infrared laser heating, and corrected profiles.

### **3. Supplementary tables**

**Table S1.** Laser powers for T-jump experiments.

**Table S2.**  $A_1$ ,  $A_2$ ,  $y_0$ ,  $k_1$ ,  $k_2$ ,  $\phi_B/\phi_A$ , and  $\phi_C/\phi_A$  at different temperatures.

## 1. Deriving the evolutions of the relative fluorescence intensity change

Due to the photobleaching of tryptophan upon long-term ultraviolet exposure, the fluorescence intensity of tryptophan gradually decreased during the measurements. Thus, a blank experiment was performed to eliminate the contribution of photobleaching to tryptophan fluorescence change. A schematic of the procedure is provided in **Fig. S2**. The fluorescence intensity evolutions in the absence (**Fig. S2a**) and presence of 1550 nm IR laser (**Fig. S2b**) were collected, respectively. Then they were converted to their corresponding relative fluorescence intensity change profiles, as shown in **Fig. S2c** and **S2d**, respectively, using the following equation,

$$\frac{\Delta I}{I_0} = \frac{I(t) - I_0}{I_0} \cdot 100\% \quad (\text{Eq. S1})$$

where  $I_0$  and  $I(t)$  denote the mean fluorescence intensity before the T-jump process and the fluorescence intensity evolution during the T-jump process, respectively. Then the corrected relative fluorescence intensity change evolution with the photobleaching eliminated, as shown in **Fig. S2e**, was derived by subtracting the time trace in **Fig. S2c** from that in **Fig. S2d**. The corrected fluorescence intensity change evolutions for tryptophan ( $W(t)$ ) and HSA ( $H(t)$ ) upon T-jump to different temperatures are shown as blue lines in **Fig. S3**. The corresponding uncorrected relative fluorescence intensity evolutions upon T-jump and fluorescence change evolution attributed to photobleaching are shown in red lines and grey lines in **Fig. S3**, concomitantly.

## 2. Supplementary figures

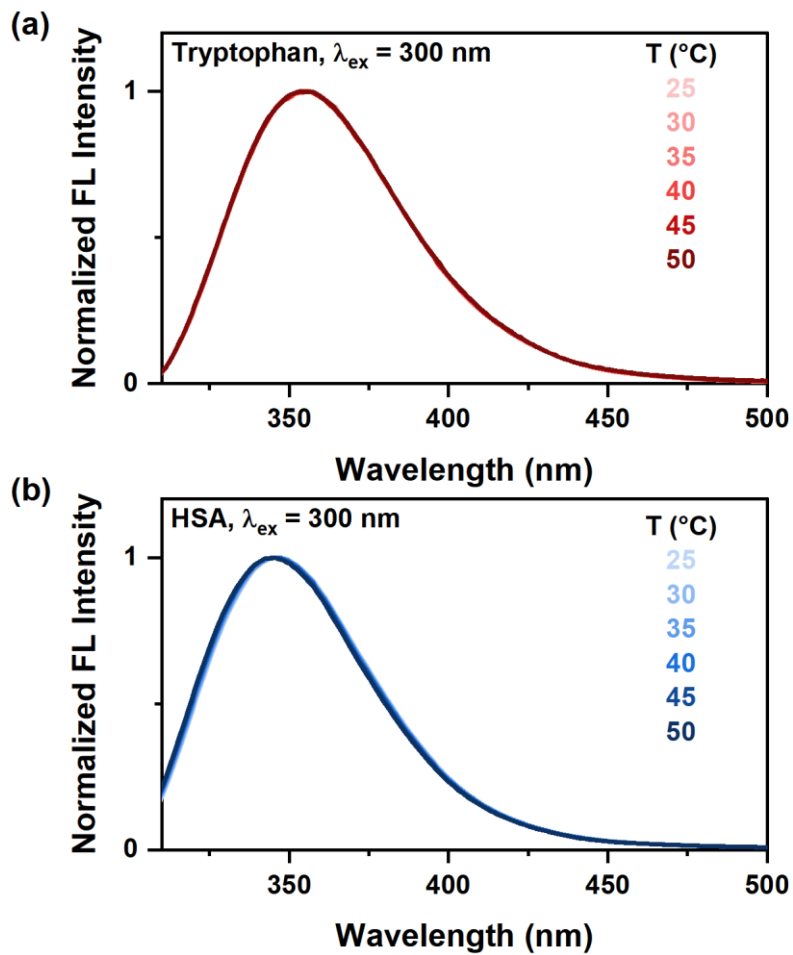

**Fig. S1.** The normalized fluorescence spectra of (a) tryptophan and (b) HSA at 25 – 50 °C upon 300 nm excitation.

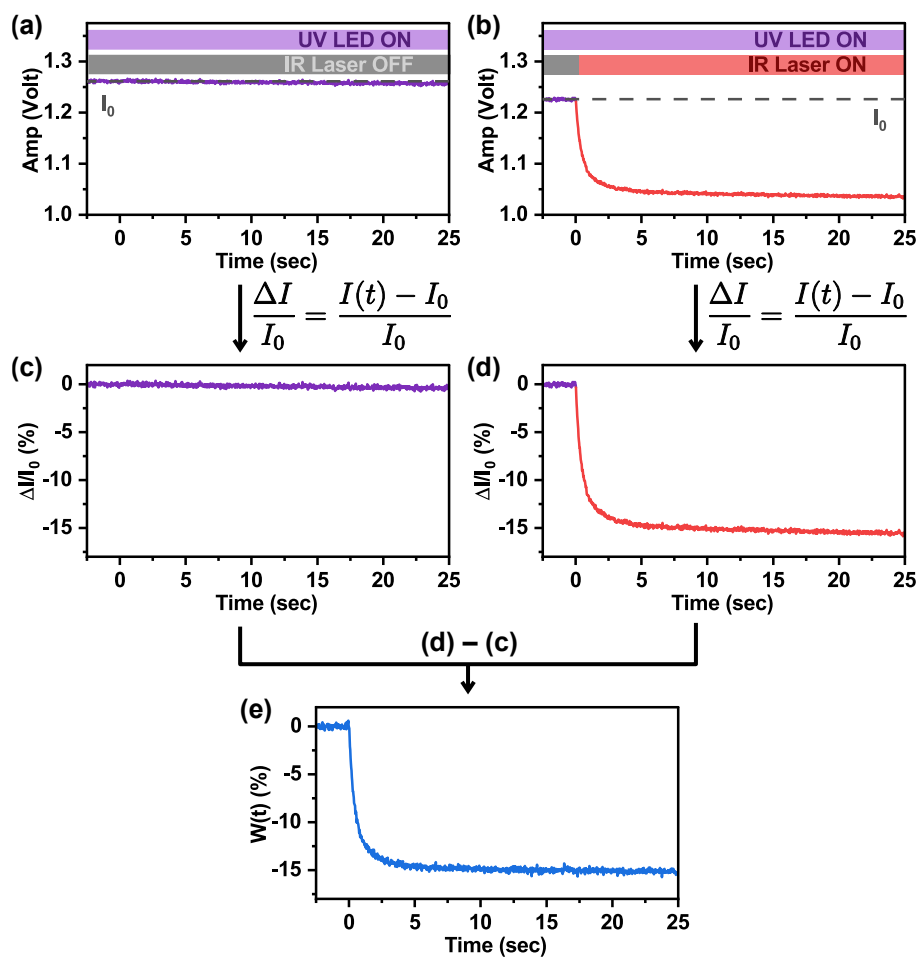

**Fig. S2.** The schematic procedure to generate the relative fluorescence intensity change evolution for tryptophan ( $W(t)$ ) upon T-jump by eliminating the photobleaching. Detailed description is provided in **Section 1** in the Supporting Information.

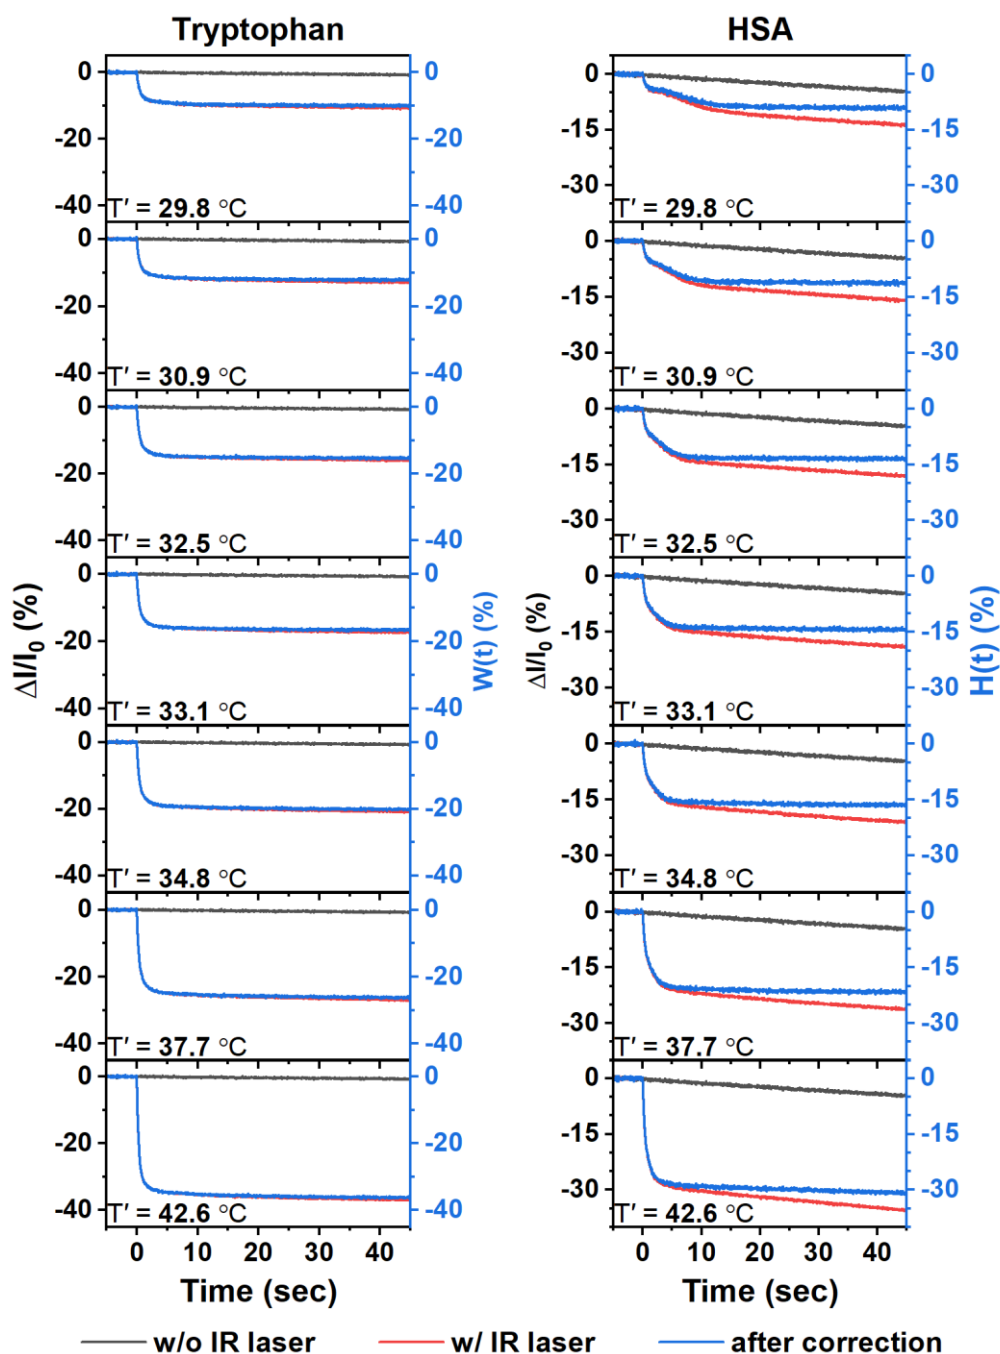

**Fig. S3.** Raw data of the evolutions of the fluorescence change of dissolved tryptophan (left-hand frame) and HSA (right-hand frame) without infrared laser heating (grey) and with infrared laser heating (red). The traces were averaged from triplicate experiments. The corrected profiles (blue) described in **Section 1** in Supporting Information were summarized in **Fig. 3a**. The starting temperature was 25.0 °C. The final temperatures in each experiment were determined by  $W(t)$  at stationary state within ca. 20–30 s.

### 3. Supplementary tables

**Table S1.** Laser powers of the continuous-wave 1550 nm laser for temperature jump experiments from initial temperature of 25.0 °C.

| Power of 1550 nm CW Laser (Watt cm <sup>-2</sup> ) | Jumped Temperature (T'/ °C) |
|----------------------------------------------------|-----------------------------|
| 14.3                                               | 29.8                        |
| 17.9                                               | 30.9                        |
| 24.7                                               | 32.5                        |
| 28.3                                               | 33.1                        |
| 32.9                                               | 34.8                        |
| 47.8                                               | 37.7                        |
| 78.9                                               | 42.6                        |

**Table S2.**  $A_1$ ,  $A_2$ ,  $y_0$ ,  $k_1$ ,  $k_2$ ,  $\phi_B/\phi_A$ , and  $\phi_C/\phi_A$  at different temperatures.

| $T'$ (°C) | $A_1$            | $A_2$           | $y_0^*$ | $k_1$           | $k_2$           | $R^2$ | $\phi_B/\phi_A$ | $\phi_C/\phi_A^*$ |
|-----------|------------------|-----------------|---------|-----------------|-----------------|-------|-----------------|-------------------|
| 29.8      | $-0.09 \pm 0.01$ | $0.09 \pm 0.01$ | 1.01    | $0.70 \pm 0.04$ | $0.16 \pm 0.01$ | 0.908 | $1.07 \pm 0.01$ | 1.01              |
| 30.9      | $-0.13 \pm 0.01$ | $0.12 \pm 0.01$ | 1.01    | $0.87 \pm 0.06$ | $0.33 \pm 0.02$ | 0.915 | $1.09 \pm 0.01$ | 1.01              |
| 32.5      | $-0.23 \pm 0.04$ | $0.21 \pm 0.04$ | 1.02    | $0.98 \pm 0.08$ | $0.50 \pm 0.03$ | 0.919 | $1.12 \pm 0.02$ | 1.02              |
| 33.1      | $-0.18 \pm 0.05$ | $0.15 \pm 0.05$ | 1.03    | $1.26 \pm 0.14$ | $0.65 \pm 0.06$ | 0.823 | $1.10 \pm 0.03$ | 1.03              |
| 34.8      | $-0.27 \pm 0.12$ | $0.22 \pm 0.12$ | 1.05    | $1.44 \pm 0.18$ | $0.86 \pm 0.11$ | 0.815 | $1.14 \pm 0.05$ | 1.05              |
| 37.7      | $-0.26 \pm 0.10$ | $0.20 \pm 0.10$ | 1.06    | $1.79 \pm 0.24$ | $1.01 \pm 0.13$ | 0.750 | $1.15 \pm 0.05$ | 1.06              |
| 42.6      | $-0.32 \pm 0.15$ | $0.23 \pm 0.16$ | 1.09    | $2.46 \pm 0.39$ | $1.42 \pm 0.25$ | 0.706 | $1.19 \pm 0.07$ | 1.09              |

\* uncertainty  $< 1 \times 10^{-3}$
